# Supplementary material
Source: Springer Nature journal article supplement (https://www.springermedizin.de/resource/supplementary/12885_2014_4792_MOESM6_ESM.pdf/9467278)

**A****SW480**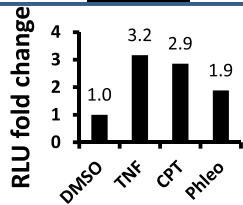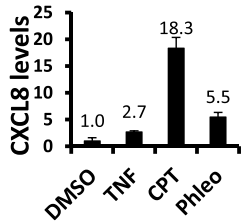**HCT116**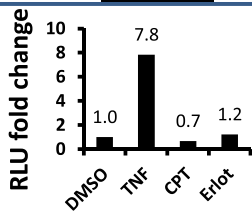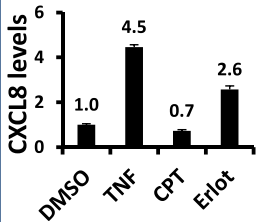**B****SW480****Bcl-xL****cIAP2****tubulin**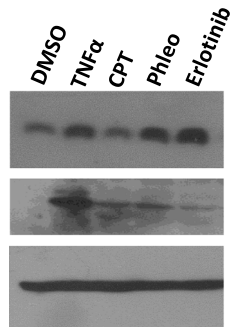**HCT116**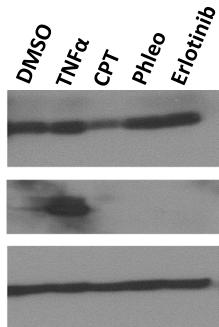

Supplement: MOESM6 [file 9467278]
